# Supplementary material for: Highlighting the Role of Universally Available and Innate Immune Cell Counts in Acute Ischemic Stroke: A Scoping Review
Source: MDPI journal article supplement (doi:10.3390/su13074069), 2021-04-06
Supplement: s1 [file s1]

**Table S1.** Summary of Studies on Neutrophil to Lymphocyte Ratio and Acute Ischemic Stroke.

|                                                                                                                                       | <b>Author, Year</b>                                                                                                             | <b>Conclusion</b>                                                                                                          | <b>Type of Study</b>               |
|---------------------------------------------------------------------------------------------------------------------------------------|---------------------------------------------------------------------------------------------------------------------------------|----------------------------------------------------------------------------------------------------------------------------|------------------------------------|
| Predicts haemorrhagic transformation, length of hospitalization, cost, disability, recurrent stroke and death among patients with AIS | Wang et al 2019 [20]                                                                                                            | High NLR increases risk of mortality three months post stroke                                                              | Cohort study and systematic review |
|                                                                                                                                       | Fan et al 2018 [21]                                                                                                             | High NLR increases risk of in-hospital mortality                                                                           | Retrospective Cohort               |
|                                                                                                                                       | Świtońska et al 2020 [22]                                                                                                       | High NLR at admission predicts haemorrhagic transformation                                                                 | Prospective Cohort                 |
|                                                                                                                                       | Brooks et al 2014 [23]                                                                                                          | High NLR poor outcome and death at 90 days                                                                                 | Retrospective Cohort               |
|                                                                                                                                       | Giede-Jeppe et al 2020 [24]                                                                                                     | High NLR predicts unfavorable functional outcome at 3 months                                                               | Observational                      |
|                                                                                                                                       | Kocaturk et al 2019 [25]                                                                                                        | High NLR was an independent predictor of 3-month mortality and higher infarct volume                                       | Prospective Cohort                 |
|                                                                                                                                       | Lim et al 2019 [26]                                                                                                             | High NLR predicts severity at the time of admission and after 3 months                                                     | Prospective Cohort                 |
|                                                                                                                                       | Guo et al 2016 [27]                                                                                                             | High NLR is associated with hemorrhagic transformation after thrombolysis in stroke patients.                              | Prospective Cohort                 |
|                                                                                                                                       | Maestrini et al 2015 [28]                                                                                                       | High NLR is associated with sICH and worse outcome at 3 months                                                             | Prospective Cohort                 |
|                                                                                                                                       | Pikija et al 2018 [29]                                                                                                          | High NLR is an independent predictor for the development of ICH after endovascular clot retrieval                          | Retrospective Cohort               |
|                                                                                                                                       | Zhang et al 2019 [30]                                                                                                           | high NLR can predict HT and 3-month mortality                                                                              | Meta-analysis                      |
| Xue et al 2017 [31]                                                                                                                   | High NLR is associated with stroke severity on admission, primary unfavorable functional outcome, and recurrent ischemic stroke | Prospective Cohort                                                                                                         |                                    |
| Risk factor for stroke among healthy and individuals with pre-existing risk factors                                                   | Suh et al 2017 [32]                                                                                                             | High NLR is an independent risk factor for ischemic stroke incidence in generally healthy adults.                          | Retrospective Cohort               |
|                                                                                                                                       | Wijeratne et al 2020 [17]                                                                                                       | High NLR predicts carotid artery stenosis and risk for stroke                                                              | Systematic Review                  |
|                                                                                                                                       | Hyun et al 2015 [34]                                                                                                            | High NLR can be a clinically significant predictor of the degree of carotid stenosis in male patients with ischemic stroke | Retrospective Cohort               |
|                                                                                                                                       | Jiang et al 2017 [35]                                                                                                           | NLR positively correlates with both maximal and accumulated extracranial carotid stenosis.                                 | Retrospective Cohort               |
|                                                                                                                                       | Zhou et al 2019 [36]                                                                                                            | NLR may reflect the severity of Aortic Arch Calcification                                                                  |                                    |
|                                                                                                                                       | Saliba et al 2015 [43]                                                                                                          | High NLR is associated with the risk of stroke in patients with atrial fibrillation.                                       | Retrospective Cohort               |

|                                             |                        |                                                                                                             |                                 |
|---------------------------------------------|------------------------|-------------------------------------------------------------------------------------------------------------|---------------------------------|
|                                             | Min et al 2017 [44]    | atrial fibrillation can be a predictor of high NLR in acute stroke patients                                 | Retrospective Cohort            |
| Increases risk of post-stroke complications | Nam et al 2018 [49]    | Higher NLR predicted SAP in patients with acute ischemic stroke                                             | Prospective Cohort              |
|                                             | Wang et al 2020 [50]   | Increased NLR around 36 h after stroke was a predictor of infection in patients with acute ischemic stroke. | Prospective Cohort              |
|                                             | Kotfis et al 2019 [57] | NLR can be regarded as a potential marker for prediction of early-onset delirium after AIS.                 | Prospective Observational Study |
|                                             | Chen et al 2019 [65]   | Increased NLRs at admission are found to be correlated with post-stroke depression                          | Prospective Cohort              |
|                                             | Hu et al 2020 [6])     | Higher NLRs and PLRs were found to be associated with depression 6 months after stroke                      | Retrospective Cohort            |
